# Supplementary material
Source: ML conference proceedings conference paper supplement (https://proceedings.neurips.cc/paper_files/paper/2020/hash/a7789ef88d599b8df86bbee632b2994d-Abstract.html)
Supplement: Supplementary file [file a7789ef88d599b8df86bbee632b2994d-Supplemental.zip]

## A Proofs

We need the following Chernoff Bound for bounded i.i.d. random variables.

**Lemma 3 (Chernoff Bound [9])** *Consider a set  $\{x_i\}$  ( $i \in [1, n_r]$ ) of i.i.d. random variables with mean  $\mu$  and  $x_i \in [0, r]$ , we have*

$$\Pr \left[ \left| \frac{1}{n_r} \sum_{i=1}^{n_r} x_i - \mu \right| \geq \varepsilon \right] \leq \exp \left( -\frac{n_r \cdot \varepsilon^2}{r \left( \frac{2}{3}\varepsilon + 2\mu \right)} \right). \quad (6)$$

### A.1 Proof of Lemma 1

Recall that in the Monte-Carlo Propagation phase of Algorithm 1, we first generate  $n_r$  random walks of length  $L$  for each training/testing node  $s \in V_t$  to estimate the  $\ell$ -th transition probability matrix  $\mathbf{S}^{(\ell)}$ ,  $\ell = 0, \dots, L$ . Since the number of training/testing nodes is  $|V_t|$ , the total cost is bounded by  $O(L|V_t|n_r)$ . After deriving  $\mathbf{S}^{(\ell)}$ , we need to compute  $\sum_{\ell=0}^L w_\ell \sum_{t=0}^{\ell} \mathbf{S}^{(\ell-t)} \mathbf{R}^{(t)}$  (line 14 in Algorithm 1). Since there are at most  $O(|V_t| \cdot n_r)$  non-zero entries in each  $\mathbf{S}^{(\ell)}$ , the total cost can be bounded by  $O(L|V_t|n_r F)$ .

On the other hand, in the Reverse Push Propagation phase of Algorithm 1, we push the residue  $\mathbf{R}^{(\ell)}(u, k)$  of node  $u$  to its neighbors whenever  $|\mathbf{R}^{(\ell)}(u, k)| > r_{max}$ ,  $k = 0, \dots, F-1$ . For random features, the average cost for this push operation is  $d$ , the average degree of the graph. We also observe that for a given level  $\ell$  and a given feature dimension  $k$ , there are at most  $1/r_{max}$  nodes with residues larger than  $r_{max}$ . Consequently, the cost of Reverse Push for a given level  $\ell$  and a given feature dimension  $k$  is  $\frac{d}{r_{max}}$ . Summing up  $\ell = 0, \dots, L-1$  and  $k = 0, \dots, F-1$ , and the Lemma follows.

### A.2 Proof of Lemma 2

Let  $\mathcal{RHS}$  denote the right hand side of equation (5); We prove the Lemma by induction. Recall that in Algorithm 1, we initialize  $\mathbf{Q}^{(t)} = 0$  and  $\mathbf{R}^{(t)} = 0$  for  $t = 0, \dots, \ell$ , and  $\mathbf{R}^{(0)} = \mathbf{D}^{-r} \mathbf{X}$ . Consequently, we have

$$\mathcal{RHS} = \mathbf{D}^r (\mathbf{D}^{-1} \mathbf{A})^\ell \mathbf{R}^{(0)} = \mathbf{D}^r (\mathbf{D}^{-1} \mathbf{A})^\ell \mathbf{D}^{-r} \mathbf{X} = (\mathbf{D}^{r-1} \mathbf{A} \mathbf{D}^{-r})^\ell \mathbf{X} = \mathbf{T}^{(\ell)},$$

which is true by definition. Assuming Equation (5) holds at some stage, we will show that the invariant still holds after a push operation on node  $u$ . More specifically, let  $\mathbf{I}_{uk} \in \mathcal{R}^{n \times F}$  denote the matrix with entry at  $(u, k)$  setting to 1 and the rest setting to zero. Consider a push operation on  $u \in V$  and  $k \in 0, \dots, F-1$  with  $|\mathbf{R}^{(t)}(u, k)| > r_{max}$ . We have two cases:

(1) If  $t \leq \ell - 1$ , we have  $\mathbf{R}^{(t)}$  is decremented by  $\mathbf{R}^{(t)}(u, k) \cdot \mathbf{I}_{uk}$  and  $\mathbf{R}^{(t+1)}$  is incremented by  $\frac{\mathbf{R}^{(t)}(u, k)}{d(v)} \cdot \mathbf{I}_{vk}$  for each  $v \in N(u)$ . Consequently, we have

$$\begin{aligned} \mathcal{RHS} &= \mathbf{T}^{(\ell)} + \mathbf{D}^r \cdot (\mathbf{D}^{-1} \mathbf{A})^{\ell-t} (-\mathbf{R}^{(t)}(u, k) \cdot \mathbf{I}_{uk}) + \mathbf{D}^r (\mathbf{D}^{-1} \mathbf{A})^{\ell-t-1} \cdot \sum_{v \in N(u)} \frac{\mathbf{R}^{(t)}(u, k)}{d(v)} \cdot \mathbf{I}_{vk} \\ &= \mathbf{T}^{(\ell)} + \mathbf{R}^{(t)}(u, k) \cdot \mathbf{D}^r (\mathbf{D}^{-1} \mathbf{A})^{\ell-t-1} \cdot \left( \sum_{v \in N(u)} \frac{1}{d(v)} \cdot \mathbf{I}_{vk} - \mathbf{D}^{-1} \mathbf{A} \mathbf{I}_{uk} \right) \\ &= \mathbf{T}^{(\ell)} + \mathbf{R}^{(t)}(u, k) \cdot \mathbf{D}^r (\mathbf{D}^{-1} \mathbf{A})^{\ell-t-1} \mathbf{0} = \mathbf{T}^{(\ell)}. \end{aligned}$$

For the second last equation, we use the fact that  $\sum_{v \in N(u)} \frac{1}{d(v)} \cdot \mathbf{I}_{vk} = \mathbf{D}^{-1} \mathbf{A} \mathbf{I}_{uk}$ .

(2) If  $t = \ell$ , we have  $\mathbf{R}^{(\ell)}$  is decremented by  $\mathbf{R}^{(\ell)}(u, k) \cdot \mathbf{I}_{uk}$  and  $\mathbf{Q}^{(\ell)}$  is incremented by  $\mathbf{R}^{(\ell)}(u, k) \cdot \mathbf{I}_{uk}$ . Consequently, we have

$$\mathcal{RHS} = \mathbf{T}^{(\ell)} + \mathbf{D}^r \cdot (-\mathbf{R}^{(\ell)}(u, k) \cdot \mathbf{I}_{uk}) + \mathbf{D}^r \cdot (\mathbf{R}^{(\ell)}(u, k) \cdot \mathbf{I}_{uk}) = \mathbf{T}^{(\ell)} + \mathbf{D}^r \cdot \mathbf{0} = \mathbf{T}^{(\ell)}.$$

Therefore, the induction holds, and the Lemma follows.

### A.3 Proof of Theorem 1

To show that Algorithm 1 achieves the desired accuracy, recall that equation (4) is an unbiased estimator for the  $\ell$ -th propagation matrix  $\mathbf{T}^{(\ell)}$ . We also observe each entry in residue matrix  $\mathbf{R}^{(\ell)}$  derived by the reserve push propagation is bounded by  $r_{max}$ , and we multiply  $\mathbf{D}^r$  to the estimator  $\mathbf{Q}^{(\ell)} + \sum_{t=0}^{\ell-1} \mathbf{S}^{(\ell-t)} \mathbf{R}^{(t)}$ , it follows the random variable of each random walk from node  $s \in V_t$  is bounded by  $d(s)^r \cdot r_{max}$ . By Chernoff Bound (Lemma 3), we have

$$\Pr \left[ \left| \hat{\mathbf{T}}^{(\ell)}(s, k) - \mathbf{T}^{(\ell)}(s, k) \right| \geq d(s)^r \varepsilon \right] \leq \exp \left( -\frac{n_r \cdot d(s)^r \cdot \varepsilon^2}{r_{max} \left( \frac{2}{3} \varepsilon + 2\mu \right)} \right) \leq \exp \left( -\frac{n_r \cdot \varepsilon^2}{r_{max} \left( \frac{2}{3} \varepsilon + 2\mu \right)} \right).$$

Where  $\mu = \mathbf{T}^{(\ell)}(s, k)$ . By setting  $n_r = O \left( \frac{r_{max} \log n}{\varepsilon^2} \right)$ , we have

$$\Pr \left[ \left| \hat{\mathbf{T}}^{(\ell)}(s, k) - \mathbf{T}^{(\ell)}(s, k) \right| \geq d(s)^r \varepsilon \right] \leq \exp \left( -\frac{\log n}{\frac{2}{3} \varepsilon + 2\mu} \right) = O \left( \frac{1}{n} \right).$$

By Lemma 1, the time complexity of the Monte-Carlo Propagation is  $O(L|V_t|n_r F)$ , and the time complexity of the Reserve Push Propagation is  $O(L \frac{d}{r_{max}} F)$ . By setting  $n_r = O \left( \frac{r_{max} \log n}{\varepsilon^2} \right)$ , the time complexity of Algorithm 1 can be express as

$$O \left( L|V_t|F + L|V_t| \frac{r_{max} \log n}{\varepsilon^2} F + L \frac{d}{r_{max}} F \right).$$

We observe that the above complexity is minimized when  $L|V_t| \frac{r_{max} \log n}{\varepsilon^2} F = L \frac{d}{r_{max}} F$ , which implies that

$$r_{max} = \sqrt{\varepsilon^2 \frac{d}{|V_t| \log n}} = \varepsilon \sqrt{\frac{d}{|V_t| \log n}}.$$

Therefore, the number of random walks per node  $n_r$  can be expressed as

$$n_r = \frac{\log n}{\varepsilon^2} \cdot \varepsilon \sqrt{\frac{d}{|V_t| \log n}} = \frac{1}{\varepsilon} \sqrt{\frac{d \log n}{|V_t|}}.$$

Finally, the total time complexity of Algorithm 1 is bounded

$$O \left( L|V_t|F + L|V_t| \frac{r_{max} \log n}{\varepsilon^2} F + L \frac{d}{r_{max}} F \right) = O \left( L|V_t|F + L \frac{\sqrt{|V_t| d \log n}}{\varepsilon} F \right),$$

and the Theorem follows.

## B Additional experimental results

### B.1 Comparison of inference time

Figure 2 shows the inference time of each method. We observe that in terms of the inference time, the three linear models, SGC, PPRGo and GBP, have a significant advantage over the two sampling-based models, LADIES and GraphSAINT.

### B.2 Additional details in experimental setup

Table 7 summarizes URLs and commit numbers of baseline codes.

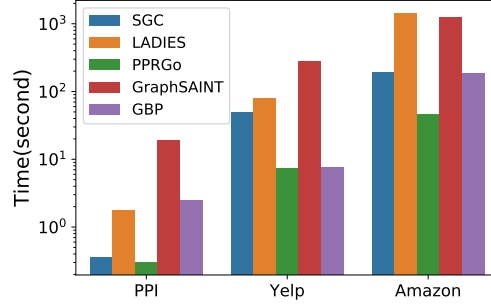

Figure 2: Inference time of 6-layers models on the entire test graph.

Table 7: URLs of baseline codes.

| Methods    | URL                                                                                                     | Commit |
|------------|---------------------------------------------------------------------------------------------------------|--------|
| GCN        | <a href="https://github.com/rusty1s/pytorch_geometric">https://github.com/rusty1s/pytorch_geometric</a> | 5692a8 |
| GAT        | <a href="https://github.com/rusty1s/pytorch_geometric">https://github.com/rusty1s/pytorch_geometric</a> | 5692a8 |
| APPNP      | <a href="https://github.com/rusty1s/pytorch_geometric">https://github.com/rusty1s/pytorch_geometric</a> | 5692a8 |
| GDC        | <a href="https://github.com/klicperajo/gdc">https://github.com/klicperajo/gdc</a>                       | 14333f |
| SGC        | <a href="https://github.com/Tiiiger/SGC">https://github.com/Tiiiger/SGC</a>                             | 6c450f |
| LADIES     | <a href="https://github.com/acbull/LADIES">https://github.com/acbull/LADIES</a>                         | c7f987 |
| PPRGo      | <a href="https://github.com/TUM-DAML/pprgo_pytorch">https://github.com/TUM-DAML/pprgo_pytorch</a>       | d9f991 |
| GraphSAINT | <a href="https://github.com/GraphSAINT/GraphSAINT">https://github.com/GraphSAINT/GraphSAINT</a>         | cd31c3 |
